# Supplementary material for: An Integrated Chromatographic Strategy for the Large-Scale Extraction of Ergosterol from Tulasnellaceae sp.
Source: MDPI journal article supplement (doi:10.3390/separations9070176), 2022-07-17

## Supporting Information

### An integrated chromatographic strategy for the large-scale extraction of ergosterol from *Tulasnellaceae* sp

Ze Wang<sup>a</sup>, Qi Wang<sup>b</sup>, PengCheng Lin<sup>a\*</sup>, Jun Dang<sup>d\*</sup>

<sup>a</sup> Key Laboratory for Tibet Plateau Phytochemistry of Qinghai Province, Qinghai Nationalities University, Xining, Qinghai, China.

<sup>b</sup> Qinghai Provincial Key Laboratory of Tibetan Medicine Research, Key Laboratory of Tibetan Medicine Research, Northwest Institute of Plateau Biology, Chinese Academy of Sciences, Xining, Qinghai, China

---

#### Corresponding authors at:

<sup>a</sup> Key Laboratory for Tibet Plateau Phytochemistry of Qinghai Province, Qinghai Nationalities University, Xining 810007, Qinghai, China.

<sup>b</sup> Key Laboratory of Tibetan Medicine Research, Northwest Institute of Plateau Biology, Chinese Academy of Sciences, Xining 810001, Qinghai, China

**E-mail:** qhlpc@126.com (PengCheng Lin), dangjun@nwipb.cas.cn (Jun Dang)

**Fax:** +86-971-6143282

## Table of Contents

|                                                                                                                                                       |   |
|-------------------------------------------------------------------------------------------------------------------------------------------------------|---|
| File S1. Species identification of the Endophytic Fungus <i>Tulasnellaceae sp.</i> from <i>Gymnadenia orchidis</i> .....                              | 3 |
| Figure S1. ESI mass spectrum of ergosterol.....                                                                                                       | 5 |
| Figure S2. <sup>1</sup> H NMR Spectrum (600 MHz) of ergosterol on the ReproSil C18 analytical column in water/ethanol (in CDCl <sub>3</sub> ). .....  | 5 |
| Figure S3. <sup>13</sup> C NMR Spectrum (151 MHz) of ergosterol on the ReproSil C18 analytical column in water/ethanol (in CDCl <sub>3</sub> ). ..... | 6 |

**File S1. Species identification of the Endophytic Fungus *Tulasnellaceae* sp. from**

***Gymnadenia orchidis***

Tulasnellaceae sp. CBS 508.93 18S ribosomal RNA gene, partial sequence; internal transcribed spacer 1, complete sequence; and 5.8S ribosomal RNA gene, partial sequence

LOCUS 272 bp DNA linear PLN 30-SEP-2013

DEFINITION Tulasnellaceae sp. CBS 508.93 18S ribosomal RNA gene, partial sequence; internal transcribed spacer 1, complete sequence; and 5.8S ribosomal RNA gene, partial sequence.

ACCESSION KF267025

VERSION KF267025.1

KEYWORDS .

SOURCE Tulasnellaceae sp. CBS 508.93

ORGANISM [Tulasnellaceae sp. CBS 508.93](#)

Eukaryota; Fungi; Dikarya; Basidiomycota; Agaricomycotina;  
Agaricomycetes; Cantharellales; Tulasnellaceae.

REFERENCE 1 (bases 1 to 272)

AUTHORS Waud,M.J., Busschaert,P., Ruyters,S., Jacquemyn,H. and Lievens,B.

TITLE Impact of primer choice on characterization of orchid mycorrhizal communities using 454 pyrosequencing

JOURNAL Unpublished

REFERENCE 2 (bases 1 to 272)

AUTHORS Waud,M.J., Busschaert,P., Ruyters,S., Jacquemyn,H. and Lievens,B.

TITLE Direct Submission

JOURNAL Submitted (17-JUN-2013) Division of Plant Ecology and Systematics,

Biology Department, KU Leuven, Kasteelpark Arenberg 31, Heverlee,

Flemish Brabant B-3001, Belgium

COMMENT      ##Assembly-Data-START##

Sequencing Technology :: Sanger dideoxy sequencing

##Assembly-Data-END##

FEATURES                      Location/Qualifiers

|                          |                                                                                                                     |
|--------------------------|---------------------------------------------------------------------------------------------------------------------|
| source                   | 1..272                                                                                                              |
|                          | /organism="Tulasnellaceae sp. CBS 508.93"                                                                           |
|                          | /mol_type="genomic DNA"                                                                                             |
|                          | /strain="CBS 508.93"                                                                                                |
|                          | /culture_collection="CBS: <a href="#">508.93</a> "                                                                  |
|                          | /db_xref="taxon: <a href="#">1403782</a> "                                                                          |
|                          | /PCR_primers="fwd_name: NS7, fwd_seq:<br>gaggcaataacaggtctgtgatgc, rev_name: ITS2, rev_seq:<br>gctgcgttcttcacgatgc" |
| <a href="#">misc_RNA</a> | <1..>272                                                                                                            |
|                          | /note="contains 18S ribosomal RNA, internal transcribed<br>spacer 1, and 5.8S ribosomal RNA"                        |

ORIGIN

```
1 aactcgcca ttagaggaa gtaaaagtcg taacaagggt tccgtaggtg aacctgcgga
61 aggatcatta atgagtttgc gcggtcgctg ctggttctta caagtcaca ccgtgtcttt
121 cttatccacc ccactgtgca tcccggtacg cttcgagcg tagtccttt acacacaacc
181 attgtaattg aattagaacg tgcgcgaatg ataataataa tacaactatc aacaacggat
241 ctcttgcat cccactgat gaagaacgca gc
```

**Figure S1. ESI mass spectrum of ergosterol.**

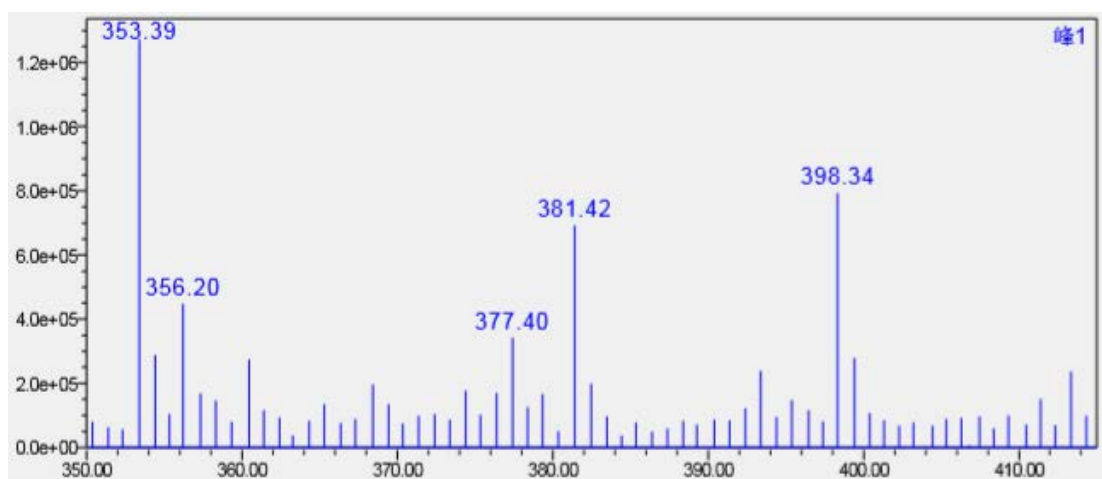

**Figure S2.  $^1\text{H}$  NMR Spectrum (600 MHz) of ergosterol on the ReproSil C18 analytical column in water/ethanol (in  $\text{CDCl}_3$ ).**

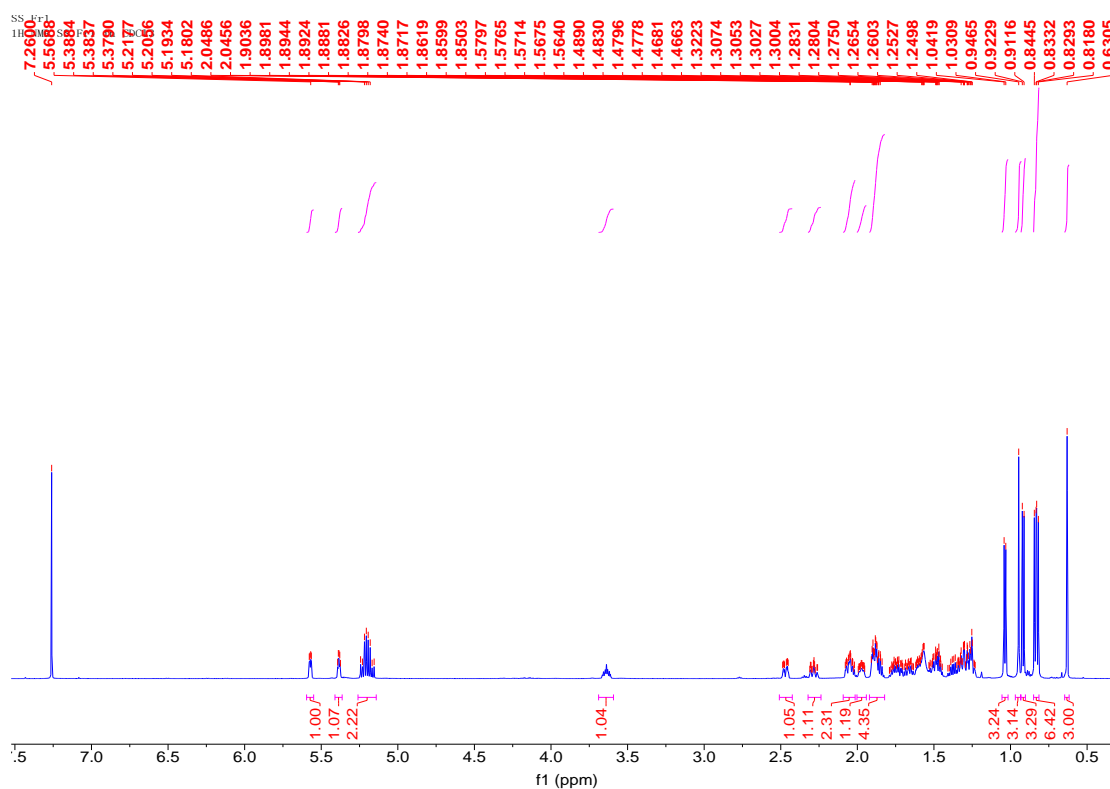

**Figure S3.  $^{13}\text{C}$  NMR Spectrum (151 MHz) of ergosterol on the ReproSil C18 analytical column in water/ethanol (in  $\text{CDCl}_3$ ).**

SS Fr1  
 $^{13}\text{C}$  NMR SS Fr1 in  $\text{CDCl}_3$

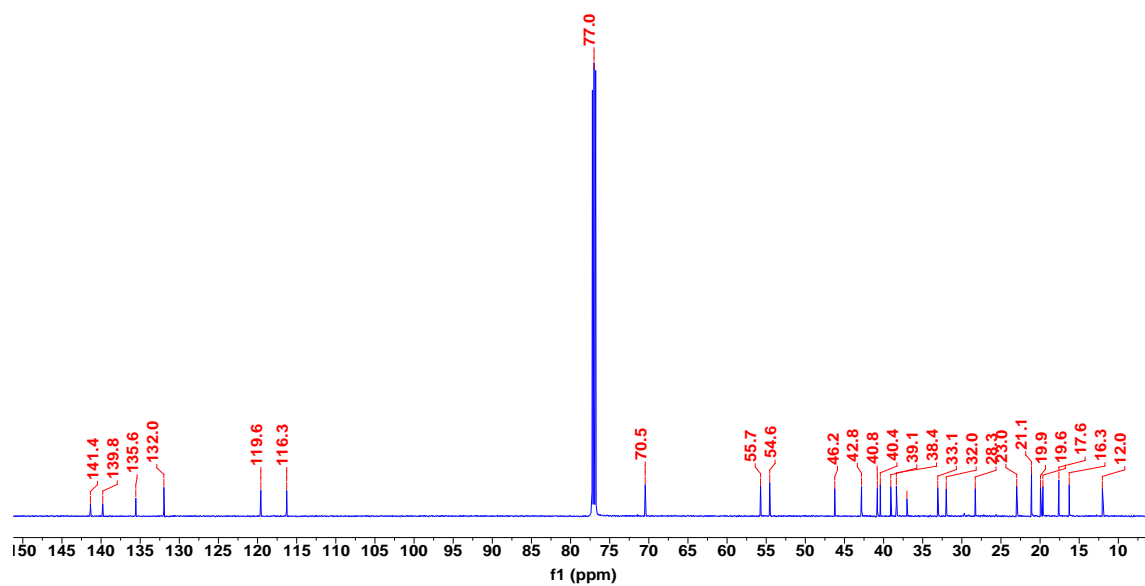

Supplement: s1 [file s1]
